# Supplementary material for: Integrated Metabolite and Transcriptome Profiling-Mediated Gene Mining of Sida cordifolia Reveals Medicinally Important Genes
Source: MDPI journal article supplement (doi:10.3390/genes13101909), 2022-10-20
Supplement: s1 [file s1]

## Sample Information

Sample Name : SS  
Sample ID : SS  
Tray# : 2  
Vial# : 51  
Injection Volume : 20  
Data File : SS.lcd

## MS Chromatogram

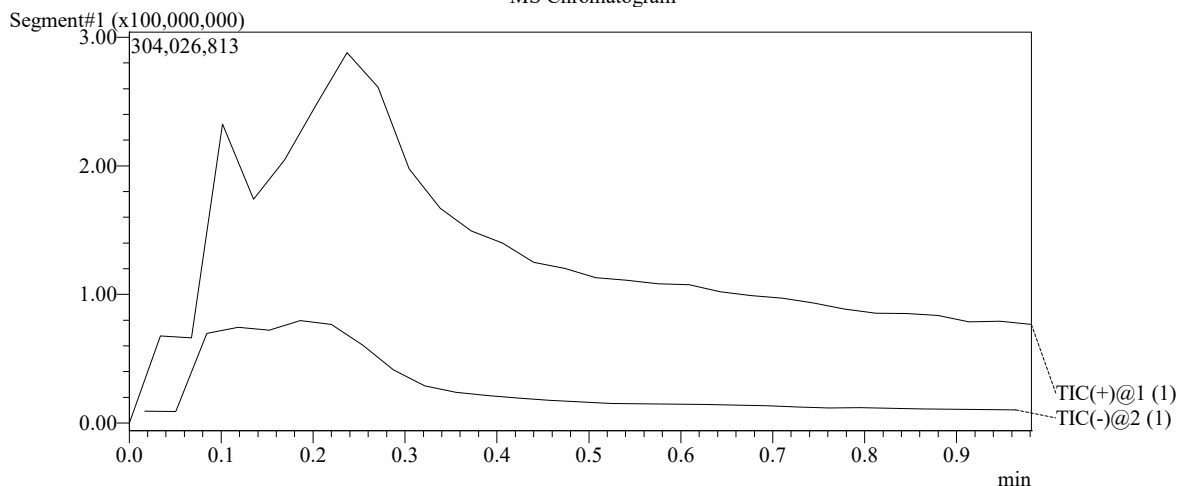

## MS Spectrum

SS.lcd

Line#:1 R.Time:---(Scan#:---)

MassPeaks:36

Spectrum Mode:Averaged 0.000-0.914(1-55) Base Peak:118(6370435)

BG Mode:None Segment 1 - Event 1

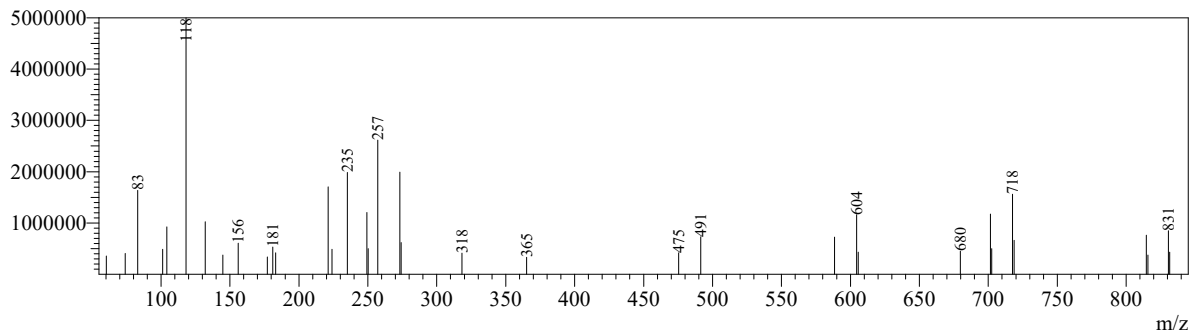

Line#:2 R.Time:---(Scan#:---)

MassPeaks:85

Spectrum Mode:Averaged 0.017-0.930(2-56) Base Peak:387(777232)

BG Mode:None Segment 1 - Event 2

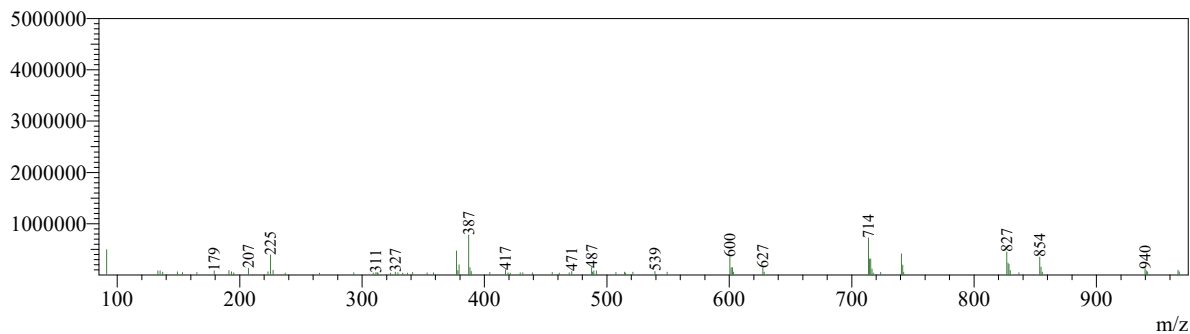

## MS Spectrum

Line#:1 R.Time:---(Scan#:---)

MassPeaks:36

Spectrum Mode:Averaged 0.000-0.914(1-55) Base Peak:118(6370435)

BG Mode:None Segment 1 - Event 1

| #  | m/z    | Absolute Intensity | Relative Intensity |
|----|--------|--------------------|--------------------|
| 1  | 60.25  | 353782             | 5.55               |
| 2  | 74.10  | 408770             | 6.42               |
| 3  | 83.05  | 1632509            | 25.63              |
| 4  | 101.25 | 485645             | 7.62               |
| 5  | 104.25 | 923360             | 14.49              |
| 6  | 118.20 | 6370435            | 100.00             |
| 7  | 132.10 | 1024069            | 16.08              |
| 8  | 144.95 | 374998             | 5.89               |
| 9  | 155.95 | 607840             | 9.54               |
| 10 | 177.15 | 339400             | 5.33               |
| 11 | 181.15 | 528518             | 8.30               |
| 12 | 183.10 | 417592             | 6.56               |
| 13 | 221.20 | 1705778            | 26.78              |
| 14 | 224.05 | 484825             | 7.61               |
| 15 | 235.15 | 1987133            | 31.19              |
| 16 | 249.20 | 1207332            | 18.95              |
| 17 | 250.20 | 502026             | 7.88               |
| 18 | 257.15 | 2614346            | 41.04              |
| 19 | 273.15 | 1990153            | 31.24              |
| 20 | 274.25 | 615206             | 9.66               |
| 21 | 318.35 | 412252             | 6.47               |
| 22 | 365.15 | 332257             | 5.22               |
| 23 | 475.40 | 415405             | 6.52               |
| 24 | 491.35 | 730823             | 11.47              |
| 25 | 588.50 | 723742             | 11.36              |
| 26 | 604.50 | 1162971            | 18.26              |
| 27 | 605.55 | 430947             | 6.76               |
| 28 | 679.65 | 446881             | 7.01               |
| 29 | 701.60 | 1173407            | 18.42              |
| 30 | 702.55 | 500515             | 7.86               |
| 31 | 717.60 | 1560454            | 24.50              |
| 32 | 718.60 | 658636             | 10.34              |
| 33 | 814.70 | 760318             | 11.94              |
| 34 | 815.65 | 373820             | 5.87               |
| 35 | 830.60 | 848908             | 13.33              |
| 36 | 831.55 | 433675             | 6.81               |

Line#:2 R.Time:---(Scan#:---)

MassPeaks:85

Spectrum Mode:Averaged 0.017-0.930(2-56) Base Peak:387(777232)

BG Mode:None Segment 1 - Event 2

| # | m/z    | Absolute Intensity | Relative Intensity |
|---|--------|--------------------|--------------------|
| 1 | 91.30  | 495087             | 63.70              |
| 2 | 133.10 | 81423              | 10.48              |
| 3 | 135.05 | 82197              | 10.58              |
| 4 | 137.15 | 58999              | 7.59               |
| 5 | 149.20 | 63894              | 8.22               |
| 6 | 153.15 | 52191              | 6.71               |
| 7 | 165.10 | 51906              | 6.68               |
| 8 | 179.15 | 79931              | 10.28              |

| #  | m/z    | Absolute Intensity | Relative Intensity |
|----|--------|--------------------|--------------------|
| 9  | 191.10 | 89143              | 11.47              |
| 10 | 193.15 | 59741              | 7.69               |
| 11 | 195.15 | 46476              | 5.98               |
| 12 | 207.15 | 128502             | 16.53              |
| 13 | 223.10 | 62510              | 8.04               |
| 14 | 225.15 | 390267             | 50.21              |
| 15 | 227.15 | 92039              | 11.84              |
| 16 | 237.10 | 39433              | 5.07               |
| 17 | 265.20 | 39583              | 5.09               |
| 18 | 293.20 | 43751              | 5.63               |
| 19 | 309.20 | 40420              | 5.20               |
| 20 | 311.25 | 44199              | 5.69               |
| 21 | 312.25 | 50764              | 6.53               |
| 22 | 313.15 | 40262              | 5.18               |
| 23 | 323.15 | 39982              | 5.14               |
| 24 | 327.20 | 55017              | 7.08               |
| 25 | 329.20 | 43983              | 5.66               |
| 26 | 333.15 | 39214              | 5.05               |
| 27 | 337.20 | 39826              | 5.12               |
| 28 | 341.20 | 48467              | 6.24               |
| 29 | 353.20 | 41642              | 5.36               |
| 30 | 358.30 | 43631              | 5.61               |
