# Supplementary material for: Integrated Metabolite and Transcriptome Profiling-Mediated Gene Mining of Sida cordifolia Reveals Medicinally Important Genes
Source: MDPI journal article supplement (doi:10.3390/genes13101909), 2022-10-20
Supplement: s1 [file s1]

## Sample Information

Sample Name : SL  
Sample ID : SL  
Tray# : 2  
Vial# : 52  
Injection Volume : 20  
Data File : SL.lcd

## MS Chromatogram

Segment#1 (x100,000,000)

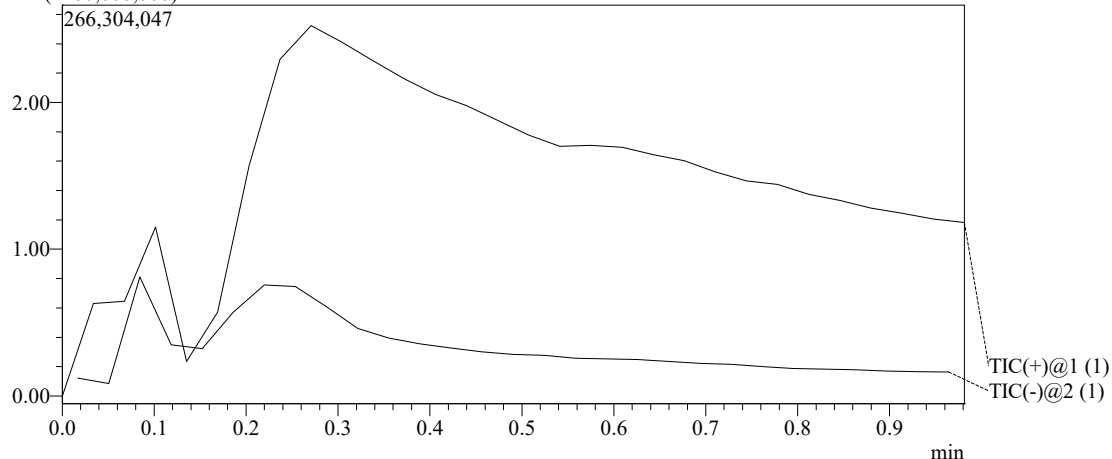

## MS Spectrum

SL.lcd

Line#:1 R.Time:----(Scan#:----)

MassPeaks:29

Spectrum Mode:Averaged 0.000-0.846(1-51) Base Peak:306(67634)

BG Mode:Averaged 0.000-0.880(1-53) Segment 1 - Event 1

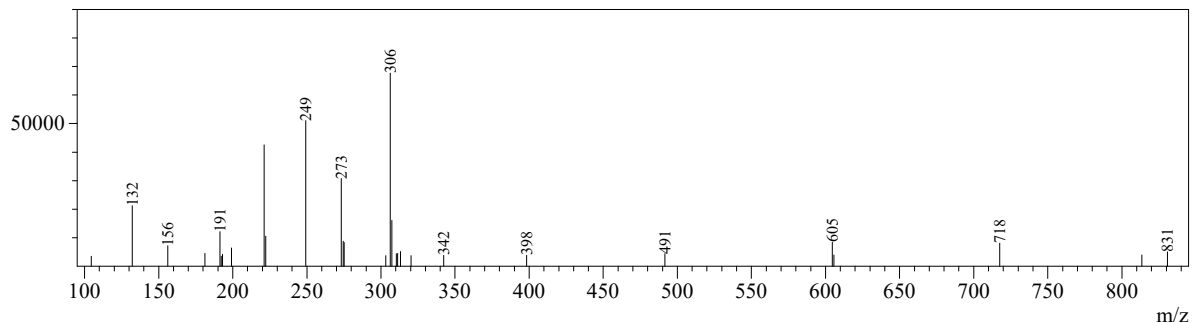

Line#:2 R.Time:----(Scan#:----)

MassPeaks:89

Spectrum Mode:Averaged 0.017-0.863(2-52) Base Peak:714(22756)

BG Mode:Averaged 0.017-0.897(2-54) Segment 1 - Event 2

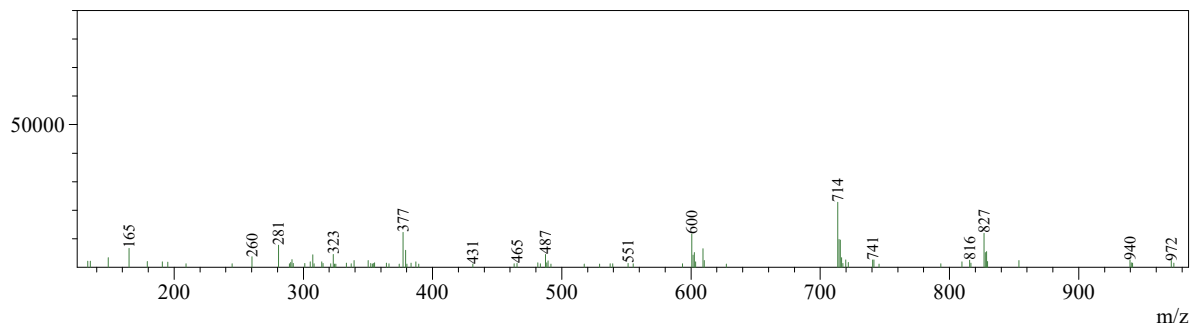

Line#:3 R.Time:---(Scan#:---)

MassPeaks:29

Spectrum Mode:Averaged 0.000-0.846(1-51) Base Peak:306(67634)

BG Mode:Averaged 0.000-0.880(1-53) Segment 1 - Event 1

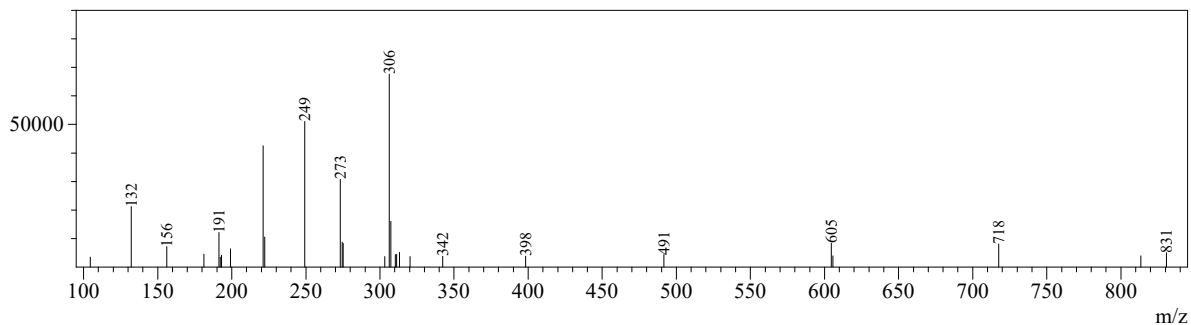

Line#:4 R.Time:---(Scan#:---)

MassPeaks:89

Spectrum Mode:Averaged 0.017-0.863(2-52) Base Peak:714(22756)

BG Mode:Averaged 0.017-0.897(2-54) Segment 1 - Event 2

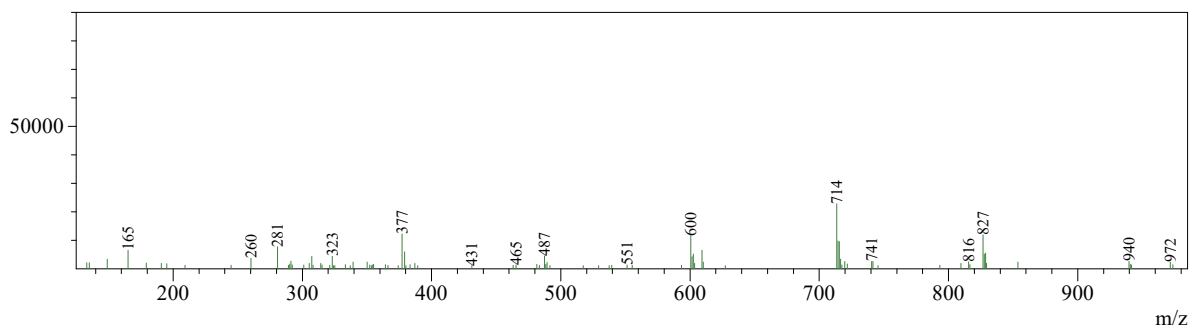

MS Spectrum

Line#:1 R.Time:---(Scan#:---)

MassPeaks:29

Spectrum Mode:Averaged 0.000-0.846(1-51) Base Peak:306(67634)

BG Mode:Averaged 0.000-0.880(1-53) Segment 1 - Event 1

| #  | m/z    | Absolute Intensity | Relative Intensity |
|----|--------|--------------------|--------------------|
| 1  | 104.50 | 3433               | 5.08               |
| 2  | 132.15 | 21239              | 31.40              |
| 3  | 156.20 | 7147               | 10.57              |
| 4  | 181.15 | 4473               | 6.61               |
| 5  | 191.25 | 12097              | 17.89              |
| 6  | 192.20 | 3527               | 5.21               |
| 7  | 193.15 | 4120               | 6.09               |
| 8  | 199.15 | 6359               | 9.40               |
| 9  | 221.20 | 42531              | 62.88              |
| 10 | 222.25 | 10574              | 15.63              |
| 11 | 249.20 | 51078              | 75.52              |
| 12 | 273.15 | 30749              | 45.46              |
| 13 | 274.40 | 8796               | 13.01              |
| 14 | 275.20 | 8254               | 12.20              |
| 15 | 303.25 | 3662               | 5.41               |
| 16 | 306.25 | 67634              | 100.00             |
| 17 | 307.25 | 16038              | 23.71              |
| 18 | 310.40 | 4355               | 6.44               |
| 19 | 311.20 | 4434               | 6.56               |
| 20 | 313.20 | 5143               | 7.60               |
| 21 | 320.30 | 3734               | 5.52               |

| #  | m/z    | Absolute Intensity | Relative Intensity |
|----|--------|--------------------|--------------------|
| 22 | 342.40 | 3835               | 5.67               |
| 23 | 398.25 | 3869               | 5.72               |
| 24 | 491.55 | 4389               | 6.49               |
| 25 | 604.60 | 8470               | 12.52              |
| 26 | 605.65 | 3938               | 5.82               |
| 27 | 717.65 | 8124               | 12.01              |
| 28 | 813.40 | 3964               | 5.86               |
| 29 | 830.70 | 5052               | 7.47               |

Line#:2 R.Time:---(Scan#:---)

MassPeaks:89

Spectrum Mode:Averaged 0.017-0.863(2-52) Base Peak:714(22756)

BG Mode:Averaged 0.017-0.897(2-54) Segment 1 - Event 2

| #  | m/z    | Absolute Intensity | Relative Intensity |
|----|--------|--------------------|--------------------|
| 1  | 133.25 | 2162               | 9.50               |
| 2  | 135.20 | 2167               | 9.52               |
| 3  | 149.15 | 3393               | 14.91              |
| 4  | 165.10 | 6569               | 28.87              |
| 5  | 179.20 | 1974               | 8.67               |
| 6  | 191.00 | 1962               | 8.62               |
| 7  | 195.10 | 1823               | 8.01               |
| 8  | 209.15 | 1281               | 5.63               |
| 9  | 245.00 | 1257               | 5.52               |
| 10 | 260.20 | 3719               | 16.34              |
| 11 | 280.90 | 7751               | 34.06              |
| 12 | 289.10 | 1198               | 5.26               |
| 13 | 290.20 | 1667               | 7.33               |
| 14 | 291.25 | 2709               | 11.90              |
| 15 | 292.15 | 1328               | 5.84               |
| 16 | 301.20 | 1295               | 5.69               |
| 17 | 305.20 | 1890               | 8.31               |
| 18 | 307.25 | 4347               | 19.10              |
| 19 | 308.20 | 1185               | 5.21               |
| 20 | 314.25 | 1868               | 8.21               |
| 21 | 315.15 | 1315               | 5.78               |
| 22 | 321.25 | 1251               | 5.50               |
| 23 | 323.20 | 4435               | 19.49              |
| 24 | 324.25 | 1141               | 5.01               |
| 25 | 325.15 | 1151               | 5.06               |
| 26 | 333.20 | 1505               | 6.61               |
| 27 | 337.10 | 1179               | 5.18               |
| 28 | 339.30 | 2311               | 10.16              |
| 29 | 350.20 | 2325               | 10.22              |
| 30 | 352.20 | 1361               | 5.98               |
| 31 | 353.30 | 1153               | 5.07               |
| 32 | 354.15 | 1360               | 5.98               |
| 33 | 355.20 | 1567               | 6.89               |
| 34 | 364.35 | 1415               | 6.22               |
| 35 | 366.20 | 1212               | 5.33               |
| 36 | 374.20 | 1175               | 5.16               |

| #  | m/z    | Absolute Intensity | Relative Intensity |
|----|--------|--------------------|--------------------|
| 37 | 377.20 | 12251              | 53.84              |
| 38 | 379.15 | 5954               | 26.16              |
| 39 | 380.05 | 1147               | 5.04               |
| 40 | 383.30 | 1422               | 6.25               |
| 41 | 387.15 | 1890               | 8.31               |
| 42 | 389.25 | 1155               | 5.08               |
| 43 | 431.25 | 1155               | 5.08               |
| 44 | 463.20 | 1260               | 5.54               |
| 45 | 465.30 | 1302               | 5.72               |
| 46 | 481.35 | 1598               | 7.02               |
| 47 | 483.40 | 1289               | 5.66               |
| 48 | 487.45 | 4440               | 19.51              |
| 49 | 488.40 | 1564               | 6.87               |
| 50 | 489.45 | 2213               | 9.72               |
| 51 | 491.50 | 1165               | 5.12               |
| 52 | 517.30 | 1174               | 5.16               |
| 53 | 529.30 | 1165               | 5.12               |
| 54 | 537.35 | 1179               | 5.18               |
| 55 | 539.35 | 1186               | 5.21               |
| 56 | 551.35 | 1295               | 5.69               |
| 57 | 555.30 | 1195               | 5.25               |
| 58 | 593.30 | 1194               | 5.25               |
| 59 | 600.50 | 11636              | 51.13              |
| 60 | 601.50 | 4296               | 18.88              |
| 61 | 602.50 | 5201               | 22.86              |
| 62 | 603.50 | 1944               | 8.54               |
| 63 | 609.25 | 6525               | 28.67              |
| 64 | 610.30 | 2409               | 10.59              |
| 65 | 627.45 | 1145               | 5.03               |
| 66 | 713.60 | 22756              | 100.00             |
| 67 | 714.60 | 9815               | 43.13              |
| 68 | 715.60 | 9496               | 41.73              |
| 69 | 716.55 | 3327               | 14.62              |
| 70 | 717.40 | 1364               | 5.99               |
| 71 | 719.60 | 2580               | 11.34              |
| 72 | 721.70 | 1687               | 7.41               |
| 73 | 740.60 | 2620               | 11.51              |
| 74 | 741.60 | 2539               | 11.16              |
| 75 | 745.55 | 1158               | 5.09               |
| 76 | 793.40 | 1188               | 5.22               |
| 77 | 809.60 | 1926               | 8.46               |
| 78 | 815.60 | 2503               | 11.00              |
| 79 | 816.65 | 1423               | 6.25               |
| 80 | 826.65 | 11921              | 52.39              |
| 81 | 827.65 | 5149               | 22.63              |
| 82 | 828.65 | 5517               | 24.24              |
| 83 | 829.55 | 1965               | 8.64               |
| 84 | 853.70 | 2369               | 10.41              |

| #  | m/z    | Absolute Intensity | Relative Intensity |
|----|--------|--------------------|--------------------|
| 85 | 939.70 | 2573               | 11.31              |
| 86 | 940.70 | 1545               | 6.79               |
| 87 | 941.70 | 1404               | 6.17               |
| 88 | 971.60 | 2402               | 10.56              |
| 89 | 973.55 | 1471               | 6.46               |

Line#:3 R.Time:---(Scan#:---)

MassPeaks:29

Spectrum Mode:Averaged 0.000-0.846(1-51) Base Peak:306(67634)

BG Mode:Averaged 0.000-0.880(1-53) Segment 1 - Event 1

| #  | m/z    | Absolute Intensity | Relative Intensity |
|----|--------|--------------------|--------------------|
| 1  | 104.50 | 3433               | 5.08               |
| 2  | 132.15 | 21239              | 31.40              |
| 3  | 156.20 | 7147               | 10.57              |
| 4  | 181.15 | 4473               | 6.61               |
| 5  | 191.25 | 12097              | 17.89              |
| 6  | 192.20 | 3527               | 5.21               |
| 7  | 193.15 | 4120               | 6.09               |
| 8  | 199.15 | 6359               | 9.40               |
| 9  | 221.20 | 42531              | 62.88              |
| 10 | 222.25 | 10574              | 15.63              |
| 11 | 249.20 | 51078              | 75.52              |
| 12 | 273.15 | 30749              | 45.46              |
| 13 | 274.40 | 8796               | 13.01              |
| 14 | 275.20 | 8254               | 12.20              |
