# Supplementary material for: Integrated Metabolite and Transcriptome Profiling-Mediated Gene Mining of Sida cordifolia Reveals Medicinally Important Genes
Source: MDPI journal article supplement (doi:10.3390/genes13101909), 2022-10-20
Supplement: s1 [file s1]

## Sample Information

Sample Name : SR  
Sample ID : SR  
Tray# : 2  
Vial# : 50  
Injection Volume : 20  
Data File : SR.lcd

## MS Chromatogram

Segment#1 (x100,000,000)

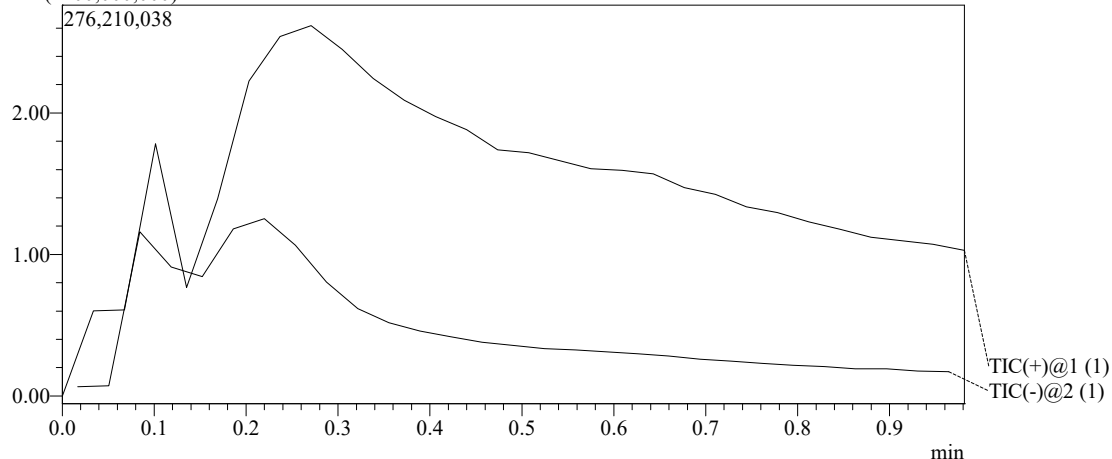

## MS Spectrum

SR.lcd

Line#:1 R.Time:----(Scan#:----)

MassPeaks:22

Spectrum Mode:Averaged 0.000-0.914(1-55) Base Peak:118(8233057)

BG Mode:None Segment 1 - Event 1

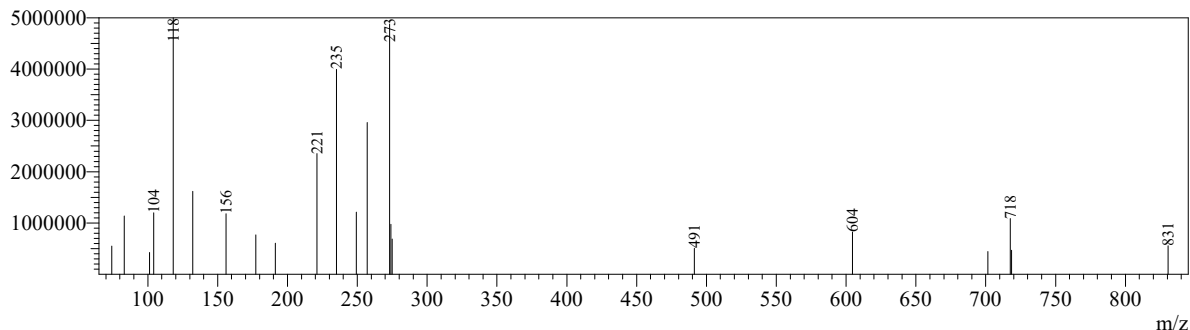

Line#:2 R.Time:----(Scan#:----)

MassPeaks:160

Spectrum Mode:Averaged 0.017-0.930(2-56) Base Peak:225(1065894)

BG Mode:None Segment 1 - Event 2

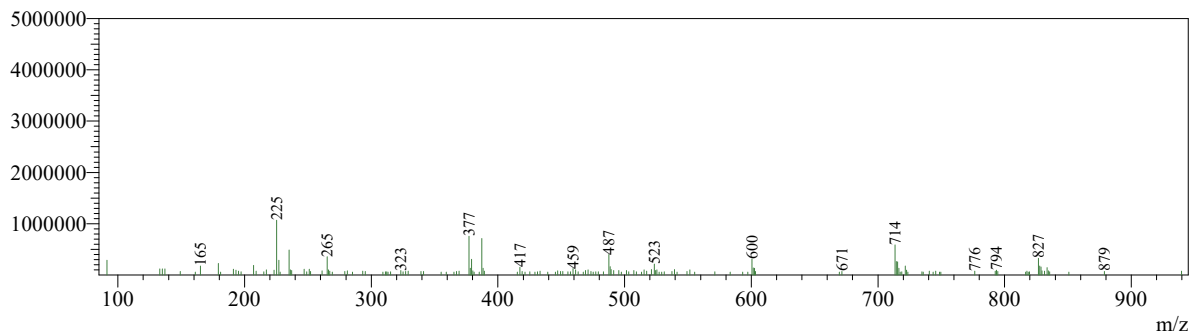

## MS Spectrum

Line#:1 R.Time:----(Scan#:----)

MassPeaks:22

Spectrum Mode:Averaged 0.000-0.914(1-55) Base Peak:118(8233057)

BG Mode:None Segment 1 - Event 1

| #  | m/z    | Absolute Intensity | Relative Intensity |
|----|--------|--------------------|--------------------|
| 1  | 74.10  | 552027             | 6.71               |
| 2  | 83.05  | 1132977            | 13.76              |
| 3  | 101.25 | 425138             | 5.16               |
| 4  | 104.25 | 1199500            | 14.57              |
| 5  | 118.20 | 8233057            | 100.00             |
| 6  | 132.15 | 1615978            | 19.63              |
| 7  | 155.95 | 1180758            | 14.34              |
| 8  | 177.20 | 770359             | 9.36               |
| 9  | 191.25 | 608286             | 7.39               |
| 10 | 221.20 | 2351699            | 28.56              |
| 11 | 235.15 | 3996560            | 48.54              |
| 12 | 249.20 | 1211596            | 14.72              |
| 13 | 257.15 | 2958133            | 35.93              |
| 14 | 273.10 | 4873579            | 59.20              |
| 15 | 274.15 | 971460             | 11.80              |
| 16 | 275.05 | 686713             | 8.34               |
| 17 | 491.35 | 507245             | 6.16               |
| 18 | 604.45 | 823060             | 10.00              |
| 19 | 701.55 | 441977             | 5.37               |
| 20 | 717.60 | 1083664            | 13.16              |
| 21 | 718.55 | 471117             | 5.72               |
| 22 | 830.65 | 553024             | 6.72               |

Line#:2 R.Time:---(Scan#:---)

MassPeaks:160

Spectrum Mode:Averaged 0.017-0.930(2-56) Base Peak:225(1065894)

BG Mode:None Segment 1 - Event 2

| #  | m/z    | Absolute Intensity | Relative Intensity |
|----|--------|--------------------|--------------------|
| 1  | 91.30  | 287636             | 26.99              |
| 2  | 133.10 | 118949             | 11.16              |
| 3  | 135.10 | 117982             | 11.07              |
| 4  | 137.15 | 115776             | 10.86              |
| 5  | 149.15 | 71497              | 6.71               |
| 6  | 161.15 | 57566              | 5.40               |
| 7  | 165.15 | 173260             | 16.25              |
| 8  | 179.15 | 225585             | 21.16              |
| 9  | 181.15 | 56181              | 5.27               |
| 10 | 191.10 | 111341             | 10.45              |
| 11 | 193.10 | 91870              | 8.62               |
| 12 | 195.15 | 74362              | 6.98               |
| 13 | 197.15 | 59731              | 5.60               |
| 14 | 207.10 | 189965             | 17.82              |
| 15 | 209.15 | 72177              | 6.77               |
| 16 | 215.15 | 60485              | 5.67               |
| 17 | 217.15 | 97284              | 9.13               |
| 18 | 223.15 | 92085              | 8.64               |
| 19 | 225.15 | 1065894            | 100.00             |
| 20 | 227.15 | 286805             | 26.91              |
| 21 | 228.10 | 54372              | 5.10               |
| 22 | 235.15 | 487511             | 45.74              |

| #  | m/z    | Absolute Intensity | Relative Intensity |
|----|--------|--------------------|--------------------|
| 23 | 236.15 | 98523              | 9.24               |
| 24 | 237.10 | 85037              | 7.98               |
| 25 | 247.10 | 110342             | 10.35              |
| 26 | 249.10 | 65527              | 6.15               |
| 27 | 251.15 | 115054             | 10.79              |
| 28 | 252.15 | 71465              | 6.70               |
| 29 | 261.10 | 79202              | 7.43               |
| 30 | 265.15 | 354783             | 33.29              |
| 31 | 266.20 | 99191              | 9.31               |
| 32 | 267.15 | 77765              | 7.30               |
| 33 | 269.20 | 55683              | 5.22               |
| 34 | 279.15 | 65687              | 6.16               |
| 35 | 281.15 | 82428              | 7.73               |
| 36 | 285.20 | 55604              | 5.22               |
| 37 | 293.20 | 77858              | 7.30               |
| 38 | 295.15 | 70462              | 6.61               |
| 39 | 309.20 | 57424              | 5.39               |
| 40 | 311.25 | 64137              | 6.02               |
| 41 | 312.20 | 61959              | 5.81               |
| 42 | 313.20 | 55752              | 5.23               |
| 43 | 315.20 | 61940              | 5.81               |
| 44 | 323.25 | 89975              | 8.44               |
| 45 | 325.20 | 64951              | 6.09               |
| 46 | 327.20 | 65595              | 6.15               |
| 47 | 329.20 | 71854              | 6.74               |
| 48 | 339.25 | 70302              | 6.60               |
| 49 | 341.15 | 68245              | 6.40               |
| 50 | 355.25 | 58810              | 5.52               |
| 51 | 359.20 | 58233              | 5.46               |
| 52 | 365.25 | 54028              | 5.07               |
| 53 | 367.20 | 66993              | 6.29               |
| 54 | 369.25 | 76209              | 7.15               |
| 55 | 377.20 | 755927             | 70.92              |
| 56 | 378.20 | 133273             | 12.50              |
| 57 | 379.20 | 303090             | 28.44              |
| 58 | 380.20 | 79593              | 7.47               |
| 59 | 381.25 | 58303              | 5.47               |
| 60 | 385.20 | 54461              | 5.11               |
| 61 | 387.20 | 710584             | 66.67              |
| 62 | 388.20 | 133731             | 12.55              |
| 63 | 389.20 | 75635              | 7.10               |
| 64 | 415.25 | 54714              | 5.13               |
| 65 | 417.20 | 151703             | 14.23              |
| 66 | 419.20 | 67092              | 6.29               |
| 67 | 421.25 | 54182              | 5.08               |
| 68 | 425.25 | 63231              | 5.93               |
| 69 | 429.25 | 56946              | 5.34               |
| 70 | 431.25 | 62870              | 5.90               |

| #  | m/z    | Absolute Intensity | Relative Intensity |
|----|--------|--------------------|--------------------|
| 71 | 433.25 | 76497              | 7.18               |
| 72 | 439.25 | 59255              | 5.56               |
| 73 | 445.25 | 55718              | 5.23               |
| 74 | 447.25 | 83060              | 7.79               |
| 75 | 449.30 | 66189              | 6.21               |
| 76 | 451.25 | 67195              | 6.30               |
| 77 | 455.30 | 64215              | 6.02               |
| 78 | 457.25 | 61478              | 5.77               |
